# Supplementary material for: 2305 陽極酸化皮膜を有するマグネシウム合金の大気中および純水中における疲労挙動(S07-1 マグネシウム合金の疲労,S07 構造材料の疲労強度とき裂進展問題)
Source: Springer Nature journal article supplement (doi:10.1186/1471-2105-15-81), 2007-09-07
Supplement: 12859_2013_6337_MOESM2_ESM.pdf [file 12859_2013_6337_MOESM2_ESM.pdf]

```
# A) Retrieve data from Cufflinks
cuffDB <- readCufflinks(dir='./cuffdiff_output/', rebuild=TRUE, gtfFile='./cuff-merge/merged.gtf') # create SQL database via cummeRbund

mySpliceRList <- prepareCuff(cuffDB) # Extract data from SQL database

# B) Identify ORFs and annotate PTCs in transcripts
require("BSgenome.Hsapiens.UCSC.hg19",character.only = TRUE) # load genome sequence

ucscCDS <- getCDS(selectedGenome="hg19", repoName="UCSC") # Get annotated ORFs

mySpliceRList <- annotatePTC(mySpliceRList, ucscCDS, Hsapiens) # Analyze ORFs

# C) Analyze alternative splicing in transcripts
mySpliceRList <- spliceR(mySpliceRList, compareTo='preTranscript', filters= 'isoOK')

# D) Create GTF file
generateGTF(mySpliceRList, filters="isoOK", filePrefix='./outputPaht/outputName')
```
