# Supplementary material for: 2305 陽極酸化皮膜を有するマグネシウム合金の大気中および純水中における疲労挙動(S07-1 マグネシウム合金の疲労,S07 構造材料の疲労強度とき裂進展問題)
Source: Springer Nature journal article supplement (doi:10.1186/1471-2105-15-81), 2007-09-07
Supplement: 12859_2013_6337_MOESM3_ESM.pdf [file 12859_2013_6337_MOESM3_ESM.pdf]

|                                                                                  | Event type                                      | No. of events |
|----------------------------------------------------------------------------------|-------------------------------------------------|---------------|
|  | Exon skipping/inclusion (ESI)                   | 1,619         |
|  | Mult. exon skipping/inclusion (MESI)            | 190           |
|  | Intron skipping/inclusion ISI                   | 256           |
|  | Alternative 5' splice site A5                   | 755           |
|  | Alternative 3' splice site A3                   | 733           |
|  | Alternative transcription start site ATSS       | 1,381         |
|  | Alternative transcription termination site ATTS | 1,125         |
|  | Mutually exclusive exons MEE                    | 22            |
|                                                                                  | All events                                      | 6,121         |
